# Supplementary material
Source: PubMed Central journal article supplement (PMC547838)
Supplement: pnas_102_5_1402__3.pdf [file pnas_102_5_1402__3.pdf]

The grey area under the distribution is the  $p$ -value of the pair of measurements.

Line corresponding to the user given  $p$ -value.

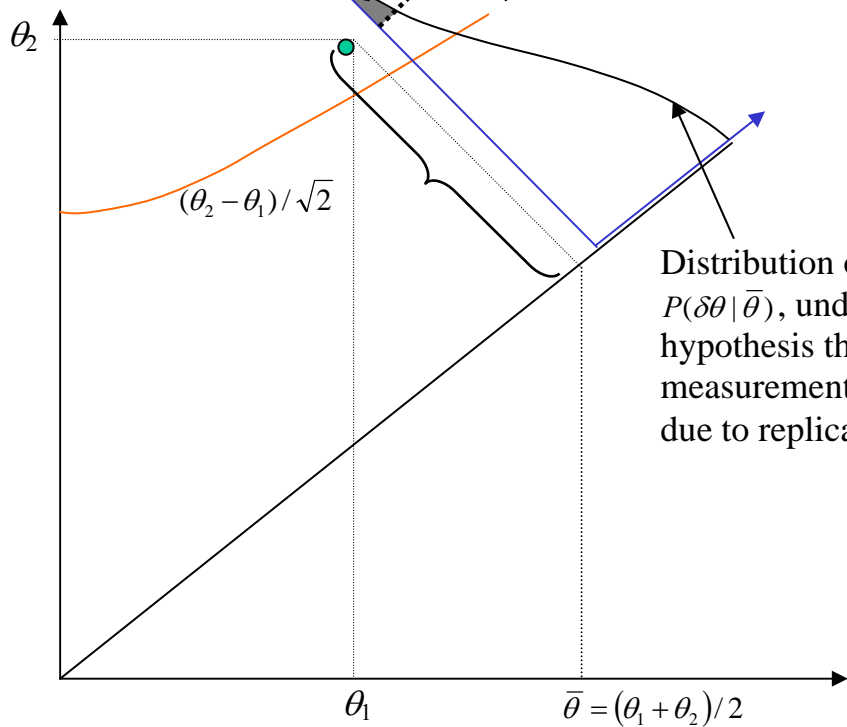

Distribution of  $\delta\theta$  given  $\bar{\theta}$   
 $P(\delta\theta | \bar{\theta})$ , under the null hypothesis that the pair of measurements differ only due to replicate noise.
