# Supplementary material
Source: PubMed Central journal article supplement (PMC547838)

# A

Null Hypothesis: Non-zeros hypothesis

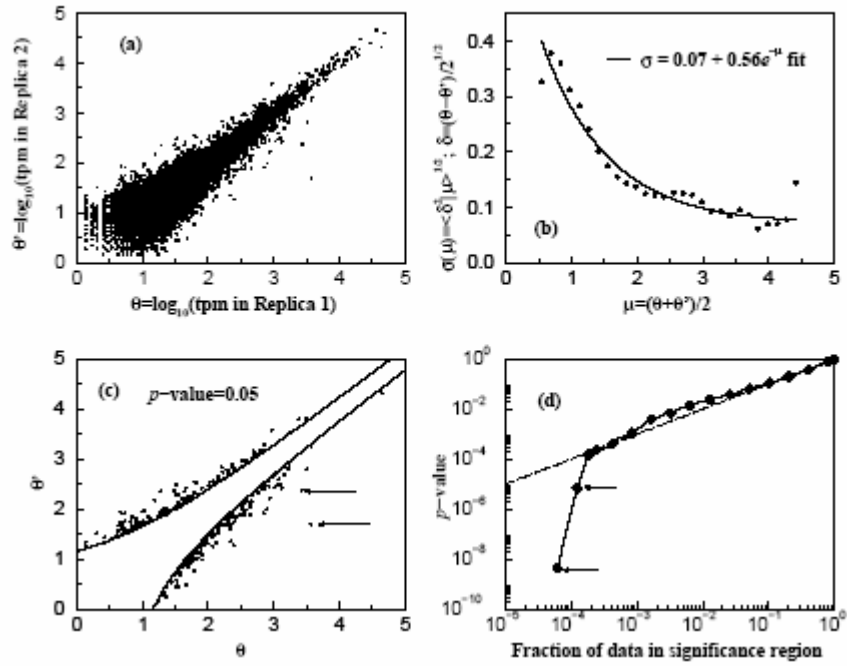

# B

Null Hypothesis: one-zero hypothesis

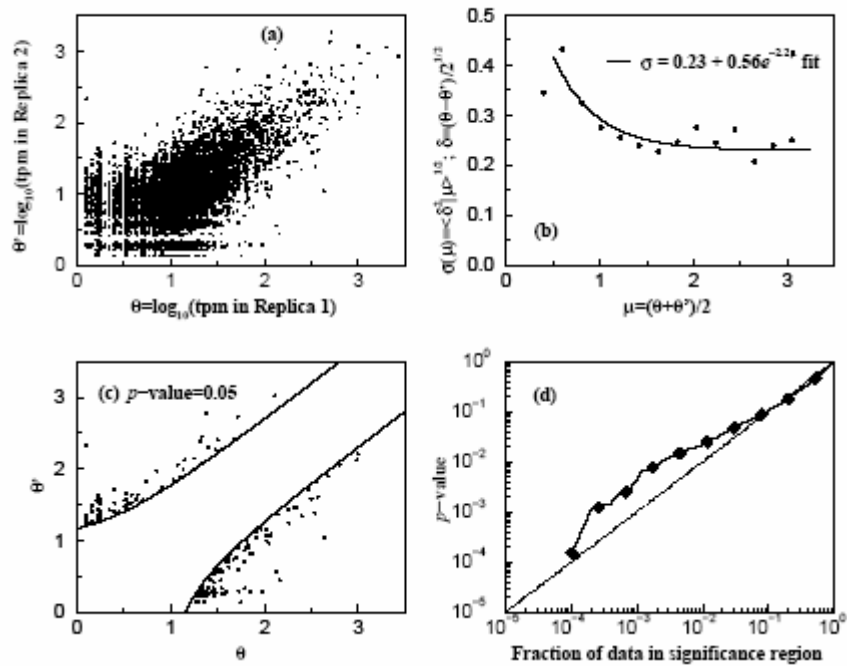

# C

Null Hypothesis: All-zeros hypothesis

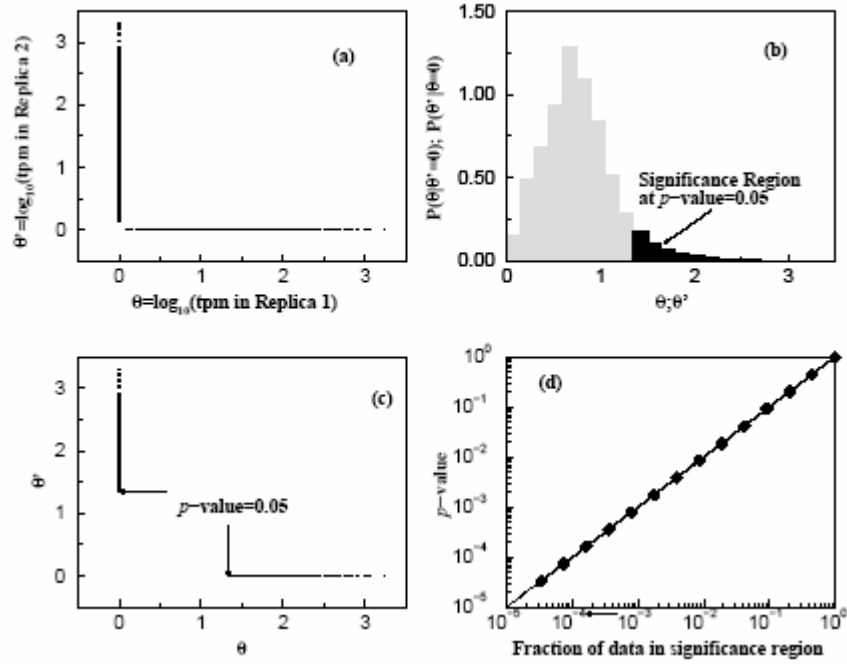

Supplement: pnas_102_5_1402__6.pdf [file pnas_102_5_1402__6.pdf]
