# Supplementary material
Source: PubMed Central journal article supplement (PMC547838)

**Time course of CD14**

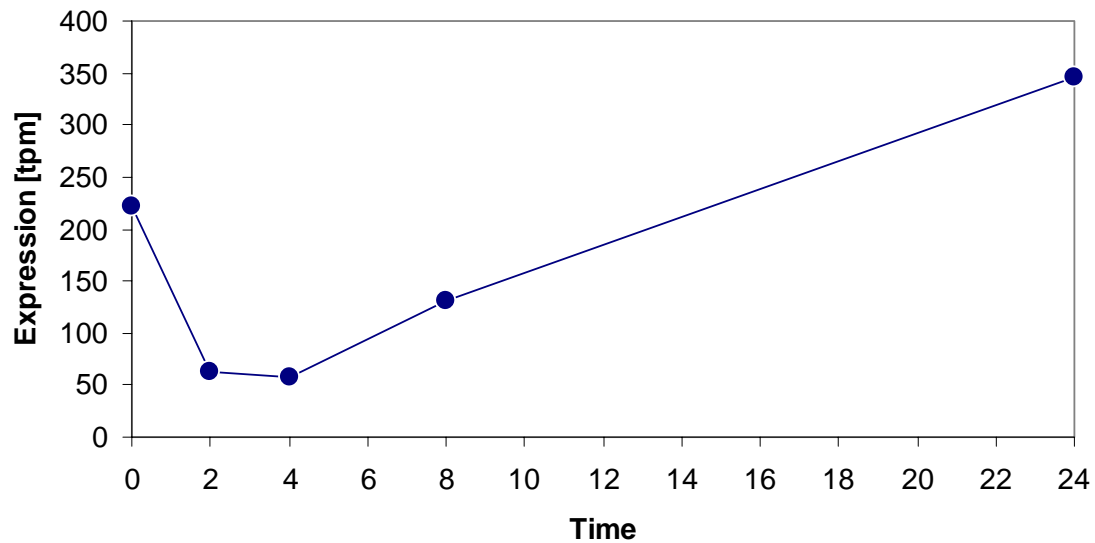

Supplement: pnas_102_5_1402__4.pdf [file pnas_102_5_1402__4.pdf]

**a**

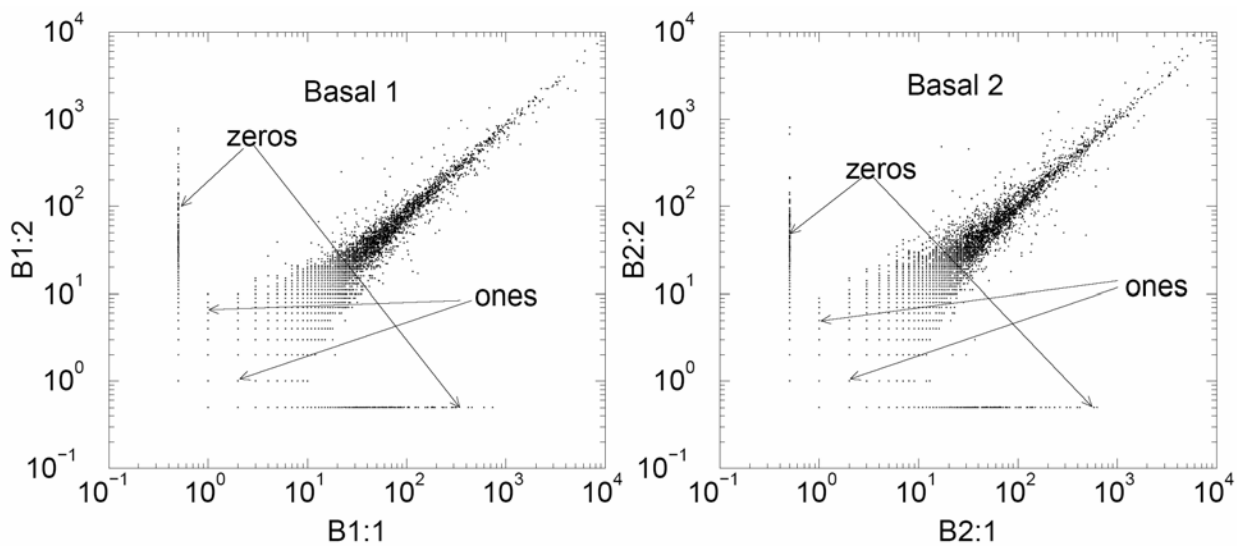

**b**

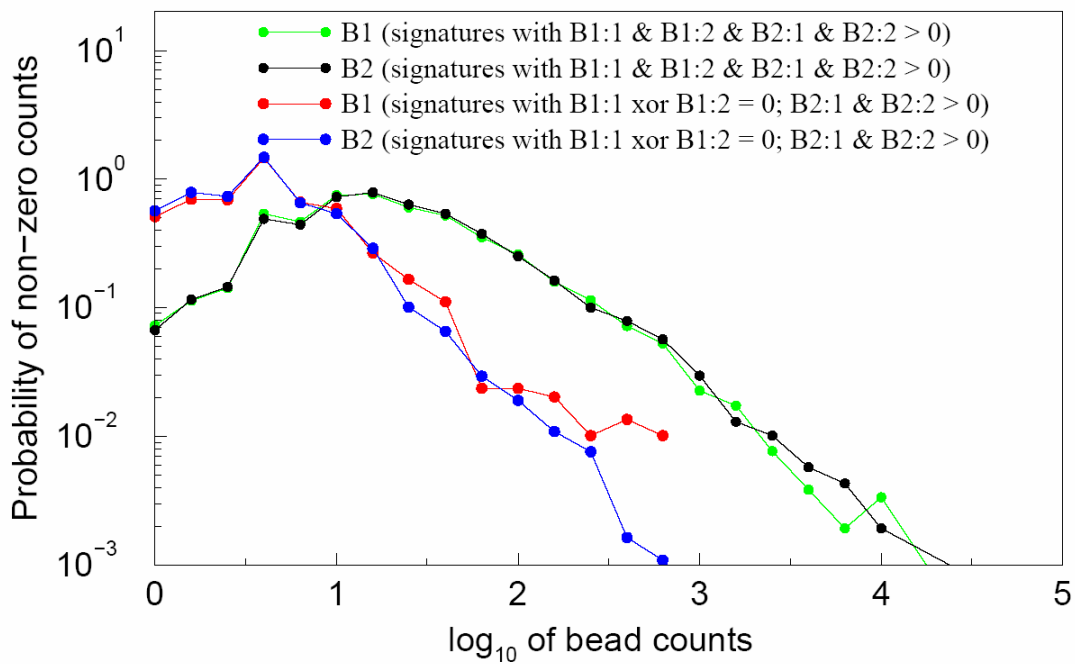

Supplement: pnas_102_5_1402__5.pdf [file pnas_102_5_1402__5.pdf]

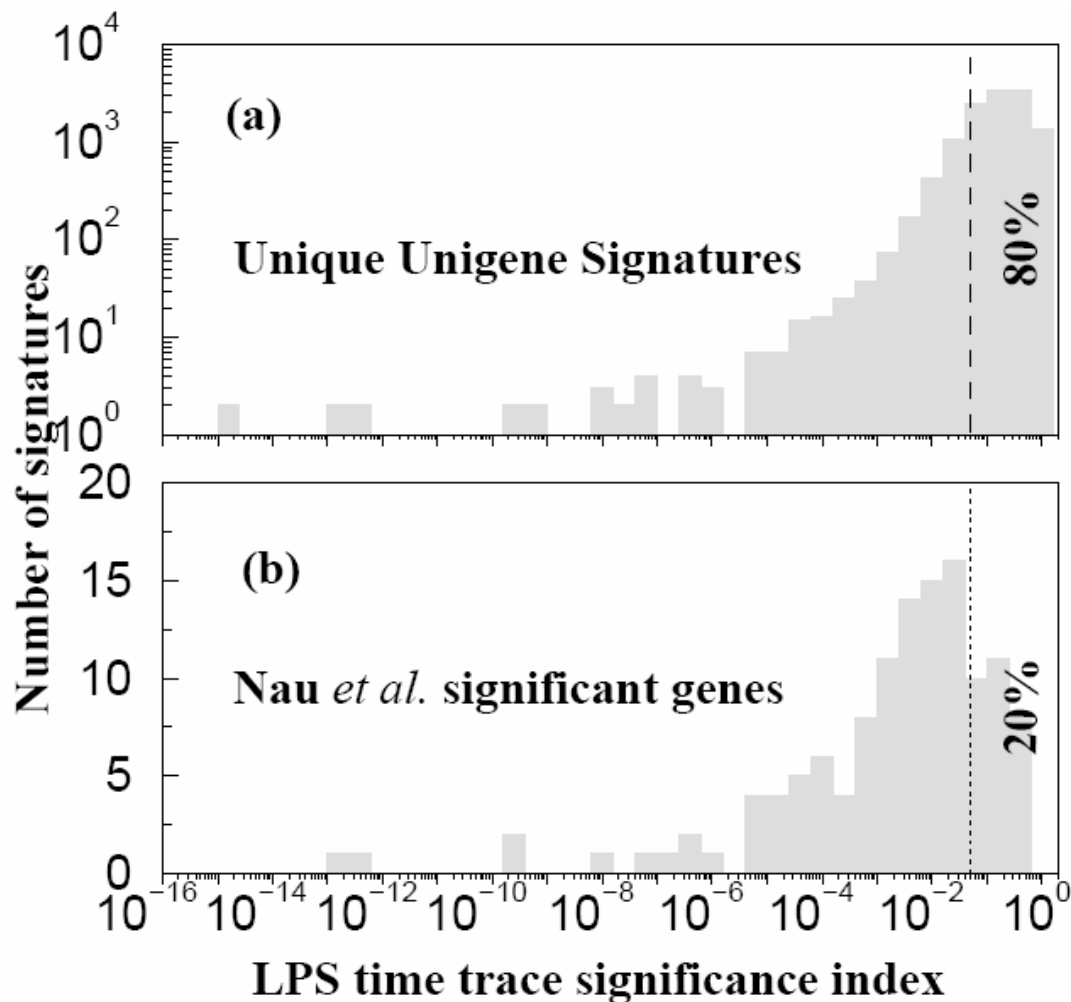

Supplement: pnas_102_5_1402__7.pdf [file pnas_102_5_1402__7.pdf]

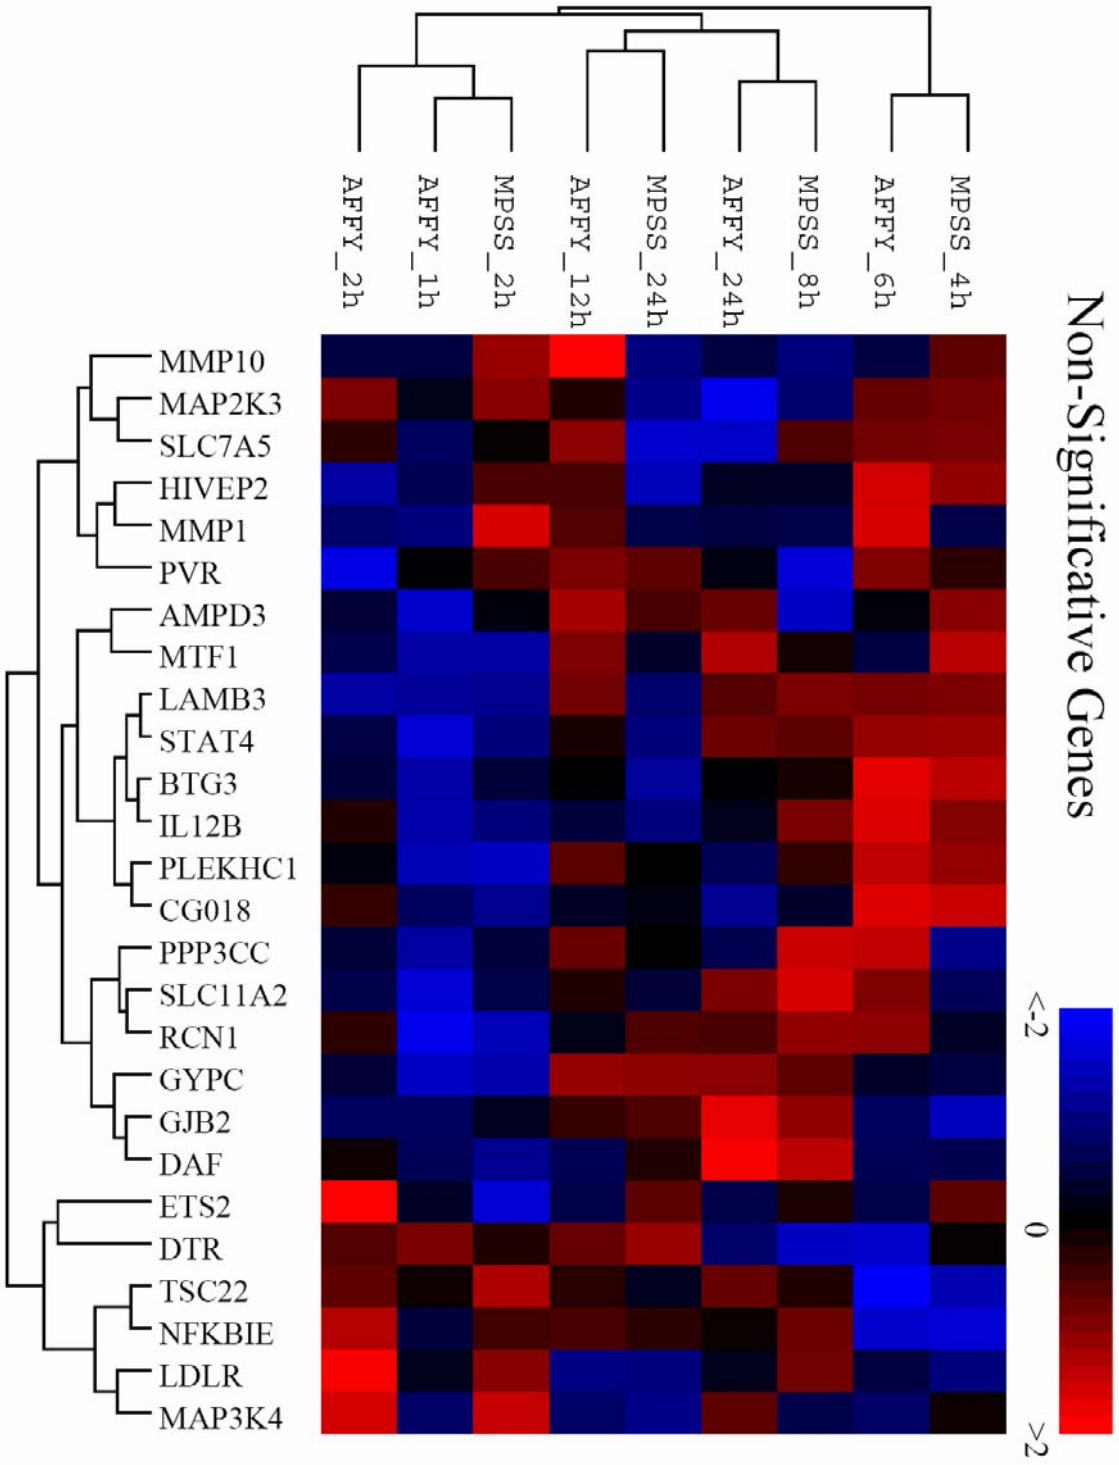

Supplement: pnas_102_5_1402__8.pdf [file pnas_102_5_1402__8.pdf]
